# Supplementary material
Source: publisher site journal article supplement (https://www.spandidos-publications.com/6631/downloadSupplementary)

Figure S1.  $^1\text{H}$ -NMR and  $^{13}\text{C}$ -NMR spectra of NIB.  $^1\text{H}$  and  $^{13}\text{C}$  NMR spectra were recorded on a JEOL ECA 500 spectrometer operating at room temperature. NMR, nuclear magnetic resonance.

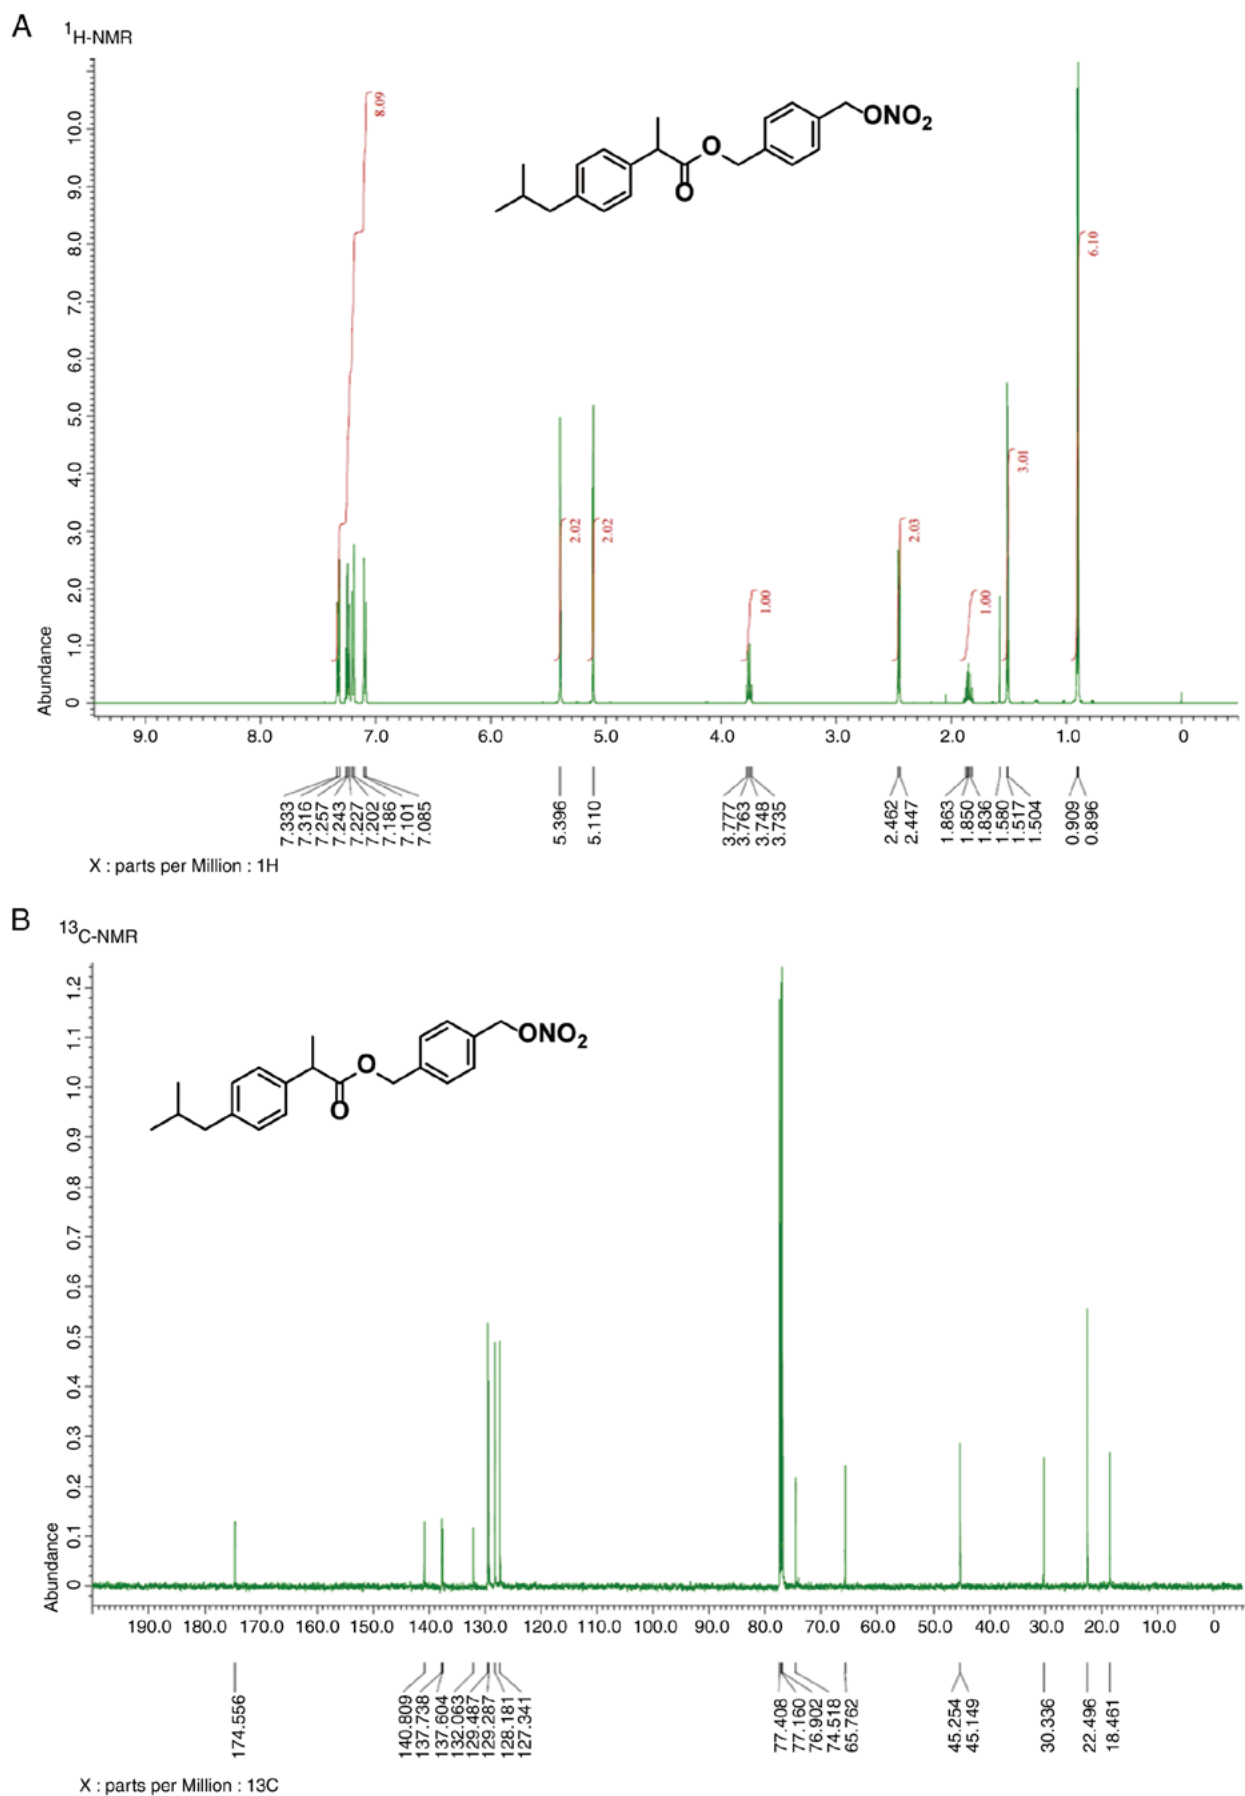

Figure S2. Representative flow cytometry dot plots of BxPC cells treated with NIB or NIE. BxPC cells were cultured with 200  $\mu$ M of NIB or NIE for 6, 12 and 24 h and with 0, 50, 100 or 200  $\mu$ M of IB, NIB or NIE for 24 h. NIB and NIE group plots that were presented in Figure 6 were the same as those for the 24 h groups presented in Fig. 4. NIB, nitrated ibuprofen benzyl linker; NIE, nitrated ibuprofen ethyl linker; IB, ibuprofen. VAD, z-VAD FMK.

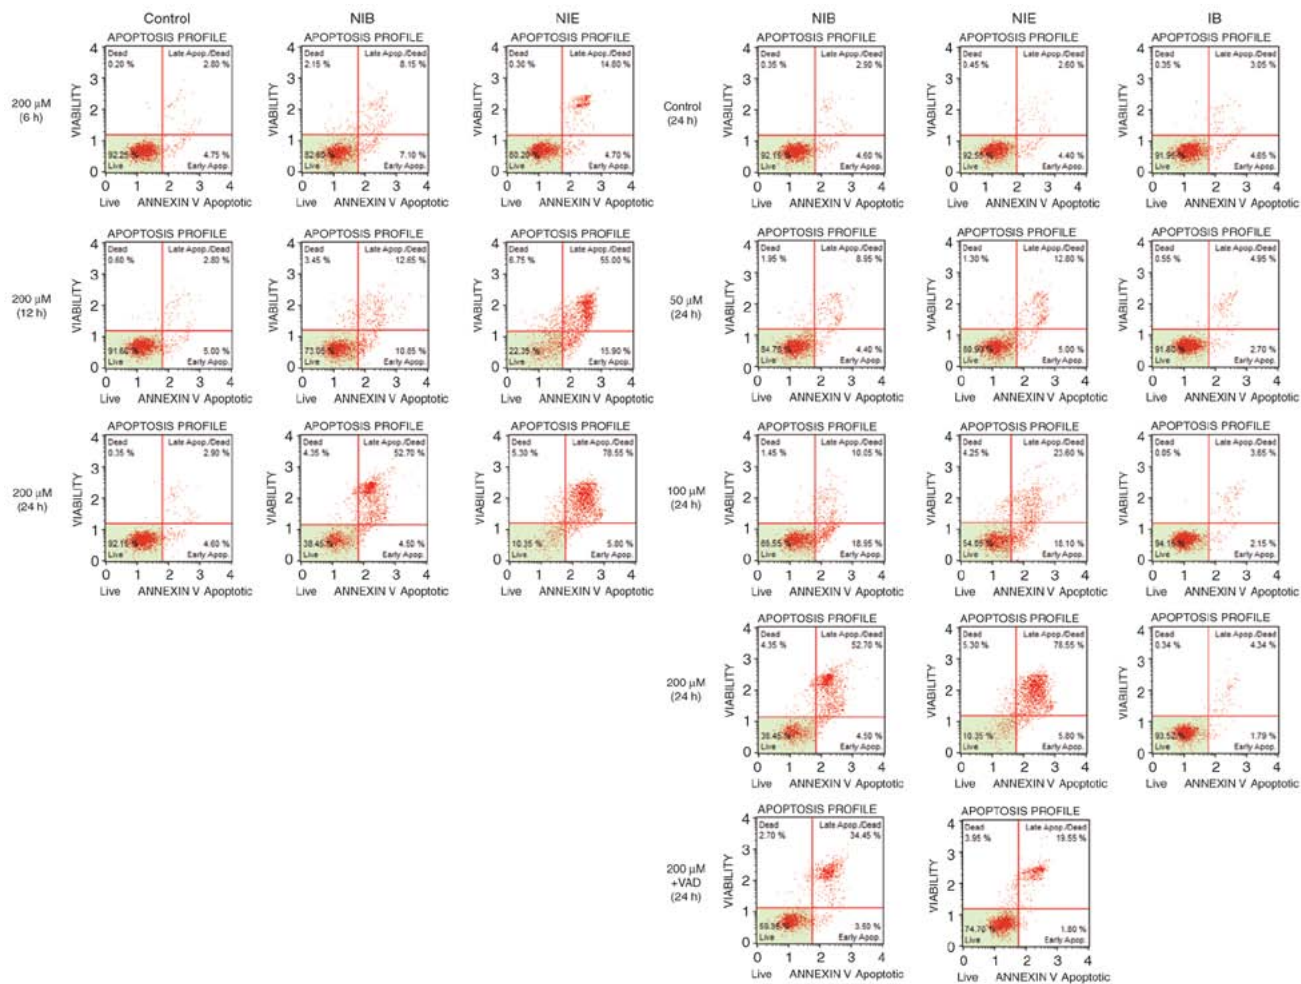

Supplement: Supplementary file 1 [file downloadSupplementary]
